# Supplementary material for: Efficacy of the Aqueous Extract of Azadirachta indica Against the Marine Parasitic Leech and Its Phytochemical Profiling
Source: PubMed Central journal article supplement (PMC8037938; doi:10.3390/molecules26071908), 2021-03-29
Supplement: molecules-26-01908-s001.pdf [file molecules-26-01908-s001.pdf]

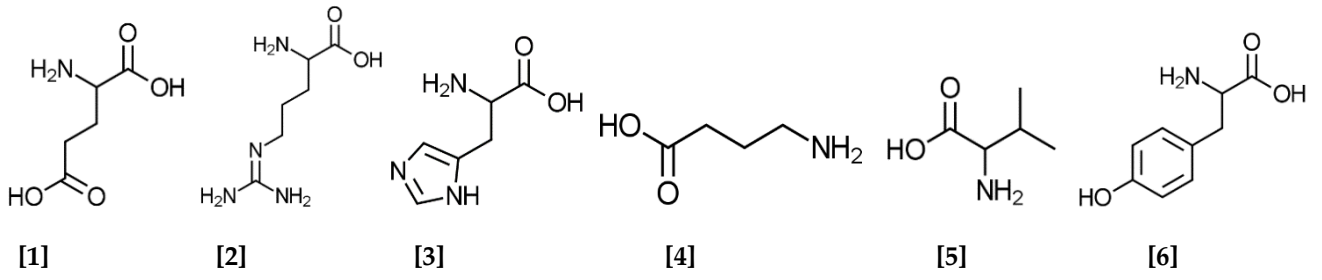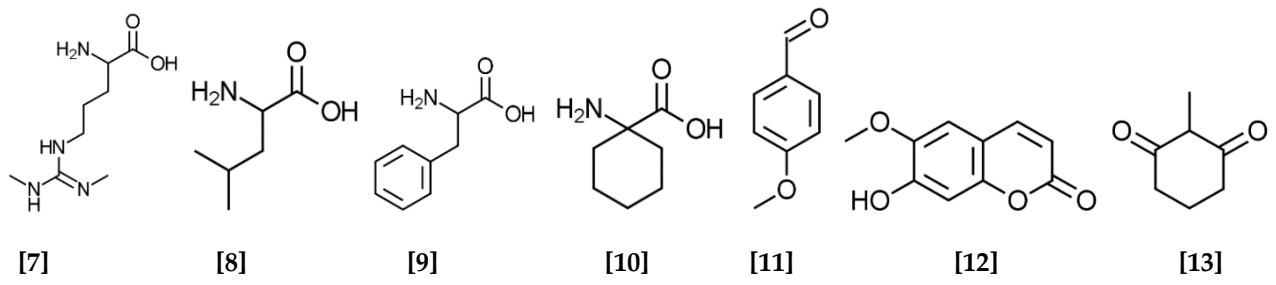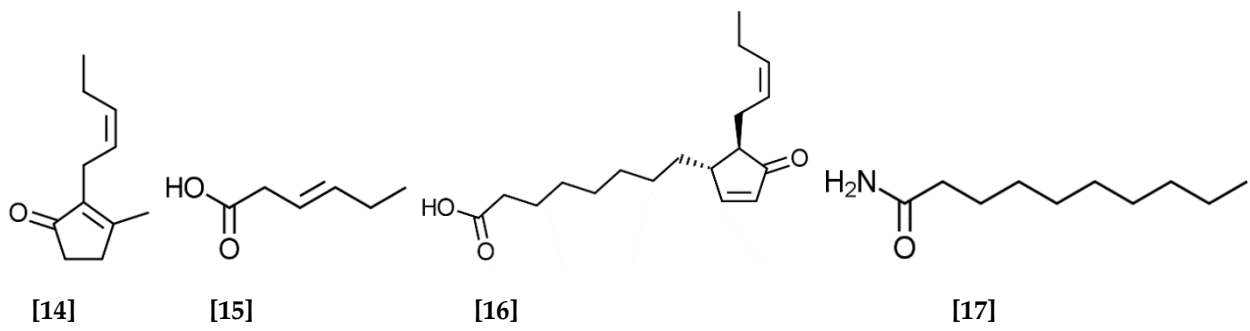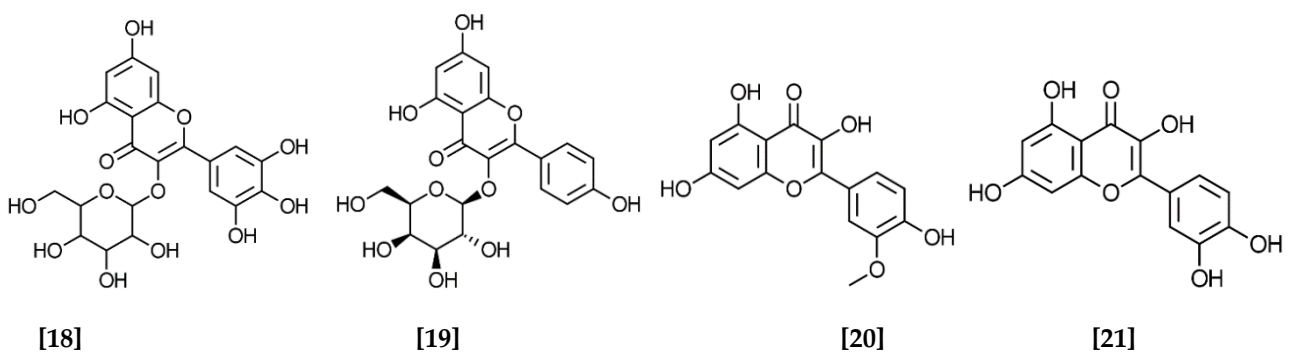

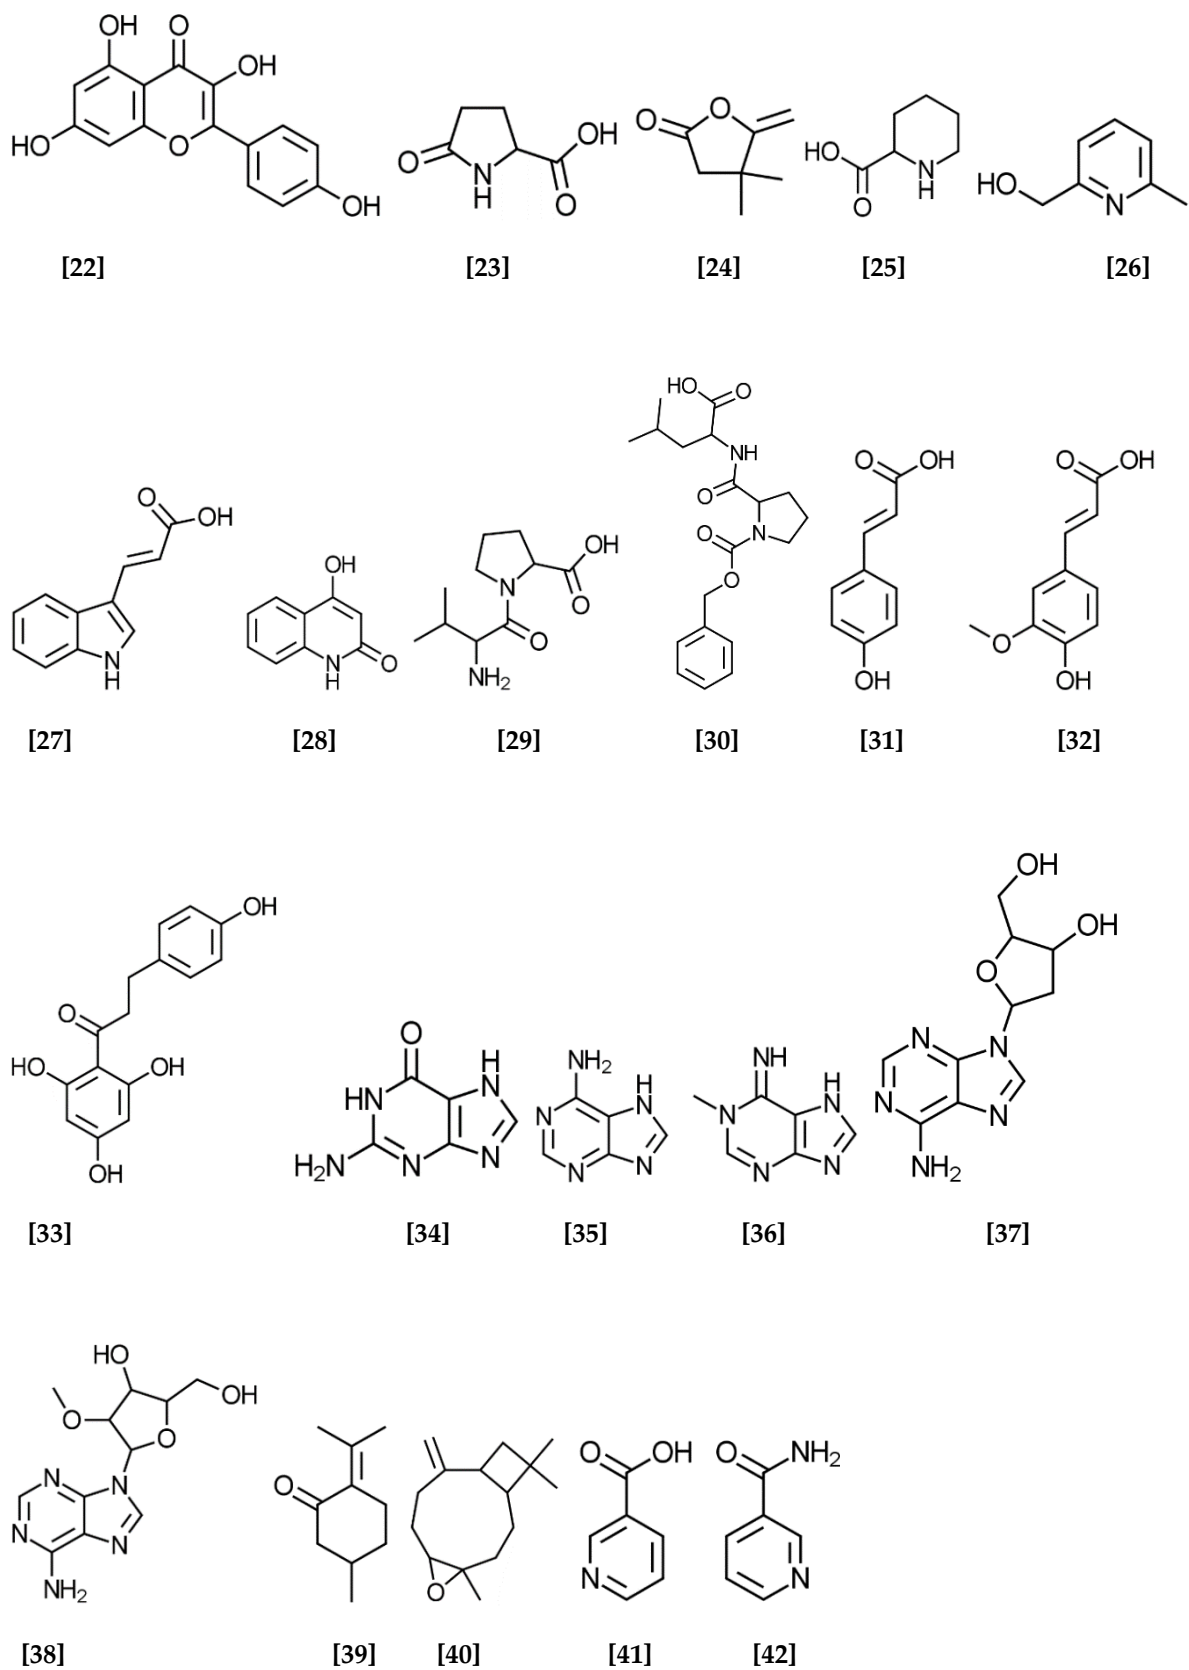

**Figure S1.** Structures of the identified compounds (1–42) from the extract of *Azadirachta indica*, compound names are given in Table 3.

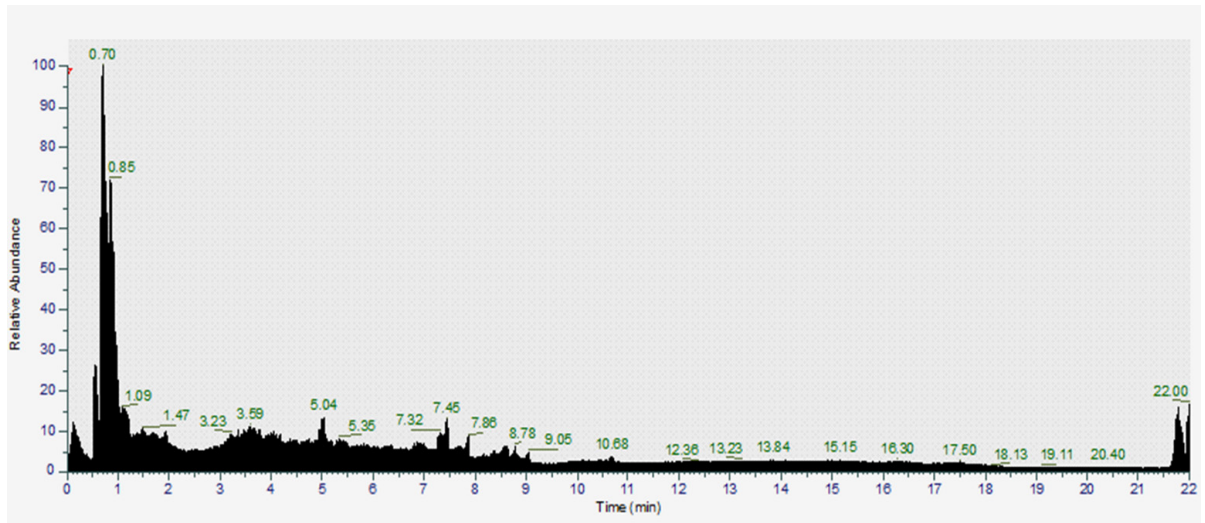

Figure S2. Base peak chromatogram (BPC) of the aqueous extract of *Azadirachta indica*
